# Supplementary material for: Effects of different electrolytes and film thicknesses on structural and thermoelectric properties of electropolymerized poly(3,4-ethylenedioxythiophene) films
Source: PubMed Central journal article supplement — RSC Adv. 2019 May 21;9(28):15957–65. doi: 10.1039/c9ra02310k (PMC9064295; doi:10.1039/c9ra02310k), 2019-05-21
Supplement: RA-009-C9RA02310K-s001.pdf [file RA-009-C9RA02310K-s001.pdf]

## Supporting Information

Effects of different electrolytes and film thicknesses on structural and thermoelectric properties of electropolymerized poly(3,4-ethylenedioxythiophene) films

*Yuhei Seki,<sup>1</sup> Momoko Takahashi,<sup>1</sup> Masayuki Takashiri<sup>1,\*</sup>*

<sup>1</sup> Department of Materials Science, Tokai University, 4-1-1 Kitakaname, Hiratsuka, Kanagawa 259-1292, Japan

\*Correspondence and requests for materials should be addressed to M.T. (email: [takashiri@tokai-u.jp](mailto:takashiri@tokai-u.jp)).

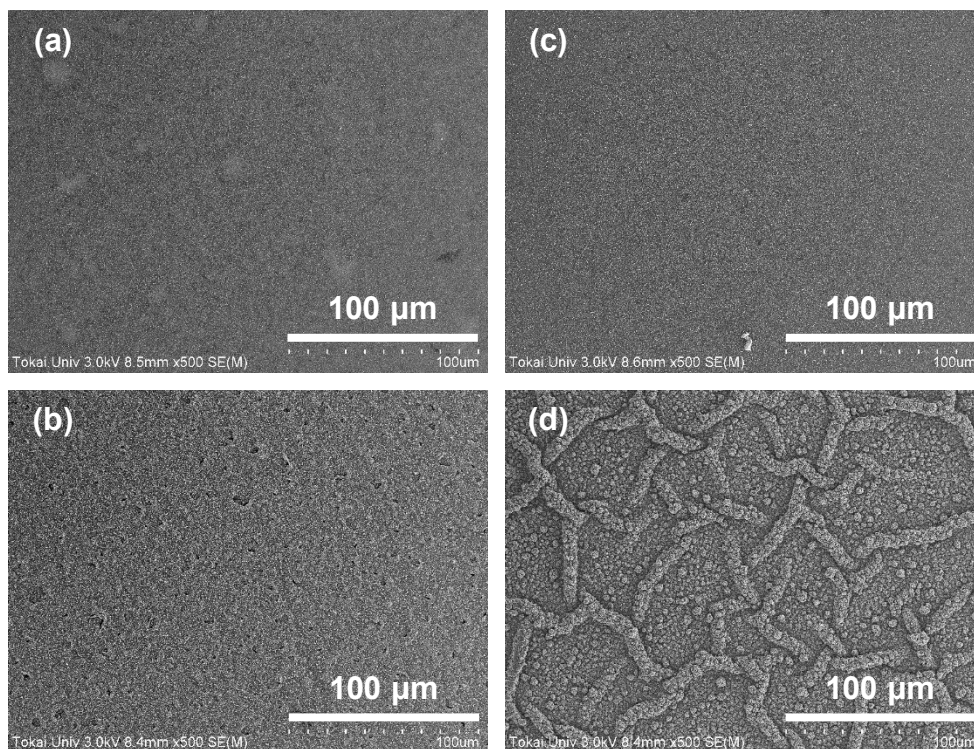

Fig. 1S Low magnification SEM images of the surface morphology of PEDOT films produced using different electrolytes and electropolymerization times. (a) Water/methanol-10 s, (b) water/methanol-480 s, (c) acetonitrile-10 s, and (d) acetonitrile-480 s. A number of pores appeared in the film produced using the water/methanol electrolyte as the electropolymerization time increased. On the other hand, many wrinkles appeared on the surface of the film produced using the acetonitrile electrolyte as the electropolymerization time increased.
